# Supplementary material for: Enhanced Cr(vi) removal by Co and PPy co-modified Ca–Al-layered double hydroxides due to adsorption and reduction mechanisms
Source: Royal Society of Chemistry journal article supplement (doi:10.1039/d4ra06943a), 2024-01-01
Supplement: d4ra06943a1.pdf [file d4ra06943a1.pdf]

## Supporting information

### **Enhanced Cr(VI) removal by Co and PPy co-modified Ca-Al-layered double hydroxides due to adsorption and reduction mechanisms**

Wenyan He<sup>1,2,\*</sup>, Kaijie Ye<sup>1</sup>, Mi Zhang<sup>1</sup>, Sheng Bai<sup>1</sup>, Siyan Xu<sup>1</sup>, Kuo Fang<sup>3</sup>

<sup>1</sup> College of Geology and Environment, Xi'an University of Science and Technology, Xi'an 710054, China

<sup>2</sup> Shaanxi Provincial Key Laboratory of Geological Support for Coal Green Exploitation, Xi'an University of Science and Technology, Xi'an 710054, China

<sup>3</sup> College of Chemical Engineering, Beijing University of Chemical Technology, Beijing, 100029, China

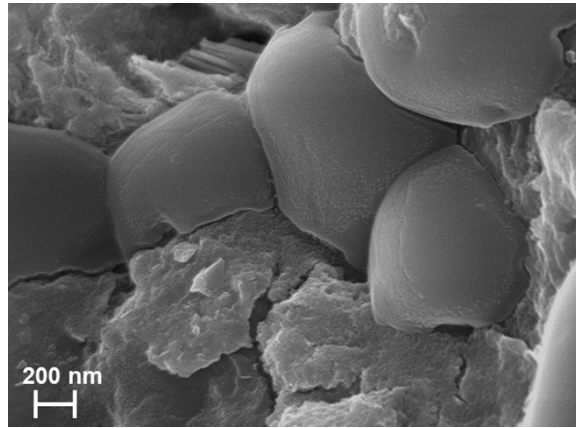

Fig. S1 SEM image of CCAL (Co:Ca:Al=1.5:2:1).

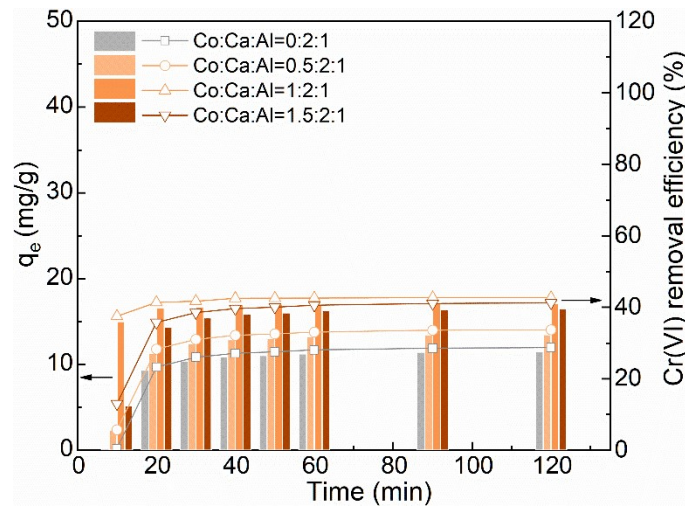

Fig. S2 Effect of molar ratio of Co:Ca:Al on the adsorption capacity and removal efficiency of Cr(VI) in 120 min.

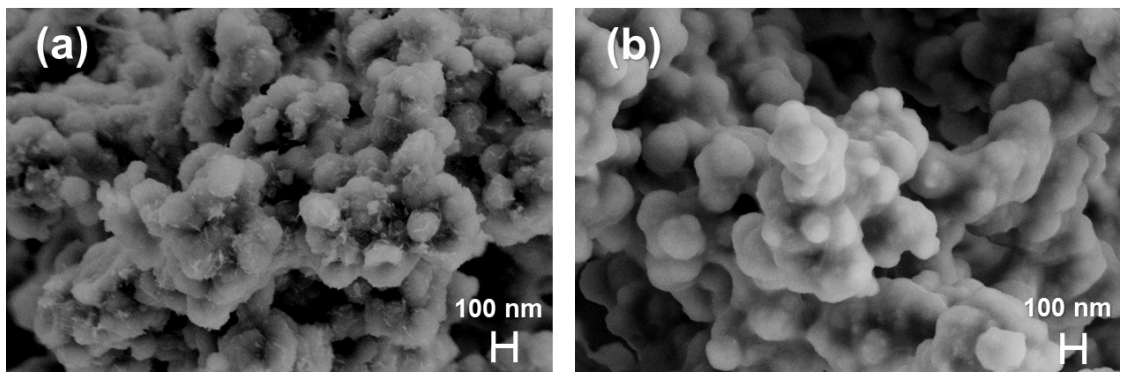

Fig. S3 SEM of CCALP prepared at (a) polymerization temperatures of 60 °C, and (b) polymerization time of 24 h.

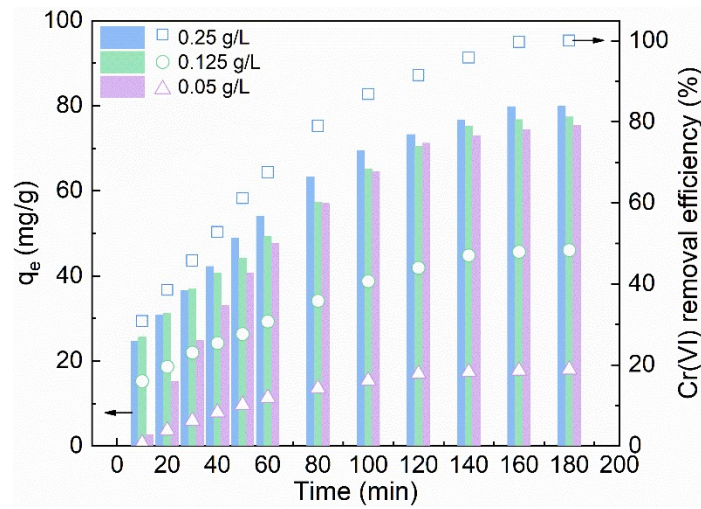

Fig. S4 Effect of low CCALP concentration on the adsorption capacity and efficiency of Cr(VI) in 180 min.

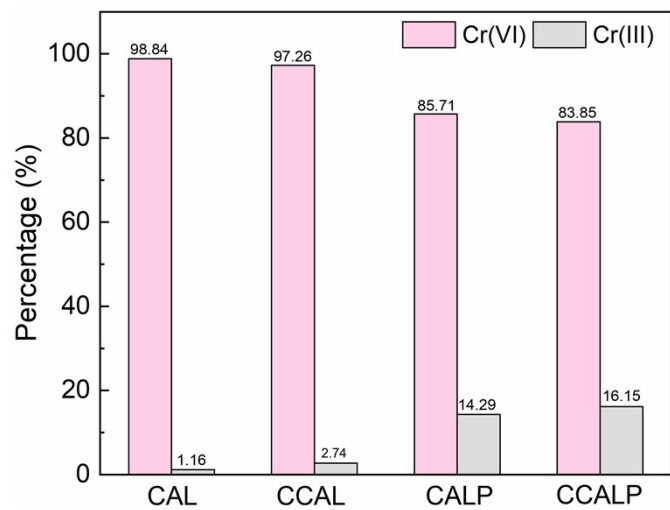

Fig. S5 The conversion ratio of Cr(VI) to Cr(III) by the four sorbents.

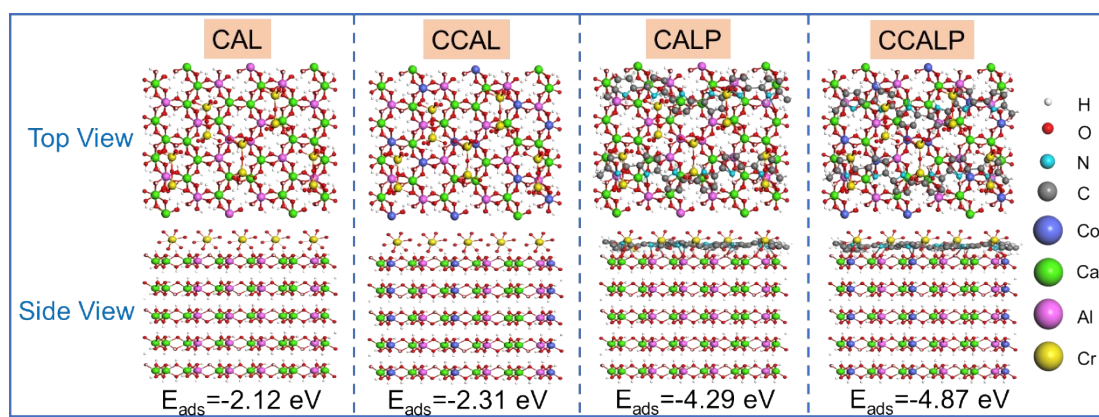

Fig. S6. Top and side views for atomic structures of CAL, CCAL, CALP and CCALP after  $\text{Cr}_2\text{O}_7^{2-}$  adsorption.

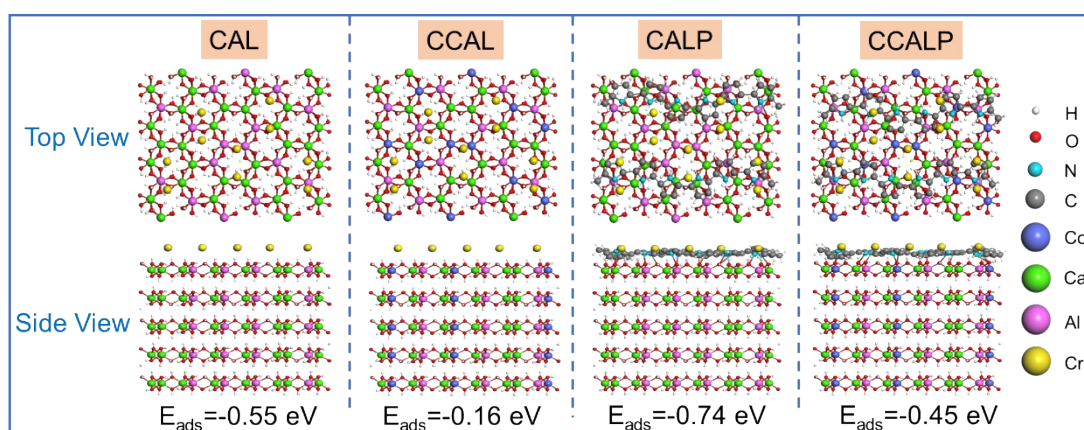

Fig. S7. Top and side views for atomic structures of CAL, CCAL, CALP and CCALP

after Cr(III) adsorption.



Table S1 Pore structure parameters of adsorbents.

| Adsorbents | $S_{\text{BET}}$ (m <sup>2</sup> /g) | Total pore volume (cm <sup>3</sup> /g) | Average aperture (nm) |
|------------|--------------------------------------|----------------------------------------|-----------------------|
| CAL        | 14.21                                | 0.0522                                 | 14.67                 |
| CCAL       | 1.55                                 | 0.0119                                 | 30.49                 |
| CALP       | 9.97                                 | 0.0300                                 | 3.07                  |
| CCALP      | 20.56                                | 0.0810                                 | 12.11                 |

Table S2 Mean and regression data of Langmuir and Freundlich isotherms for Cr(VI)

adsorption by different adsorbents at different temperatures.

|            | Adsorbents | Temperature (K) | $Q_{max}$ (mg/g)                      | b (L/mg) | $R^2$  | $R_L$ |
|------------|------------|-----------------|---------------------------------------|----------|--------|-------|
| Langmuir   | CAL        | 298             | 13.59                                 | 0.2037   | 0.8674 | 0.20  |
|            |            | 308             | 17.05                                 | 0.2817   | 0.9272 | 0.15  |
|            |            | 318             | 19.42                                 | 0.3300   | 0.9273 | 0.13  |
|            | CCAL       | 298             | 28.87                                 | 0.1923   | 0.8991 | 0.21  |
|            |            | 308             | 32.73                                 | 0.1692   | 0.9249 | 0.23  |
|            |            | 318             | 35.44                                 | 0.1513   | 0.9120 | 0.25  |
|            | CALP       | 298             | 438.09                                | 0.0053   | 0.9588 | 0.90  |
|            |            | 308             | 492.88                                | 0.0062   | 0.9594 | 0.89  |
|            |            | 318             | 594.64                                | 0.0050   | 0.9357 | 0.91  |
|            | CCALP      | 298             | 635.30                                | 0.0053   | 0.9579 | 0.90  |
|            |            | 308             | 734.98                                | 0.0046   | 0.9553 | 0.92  |
|            |            | 318             | 845.25                                | 0.0039   | 0.9599 | 0.93  |
|            | Adsorbents | Temperature (K) | $K_f$ ((mg/g)/(mg/L) <sup>1/n</sup> ) | n        | $R^2$  | -     |
| Freundlich | CAL        | 298             | 9.53                                  | 16.67    | 0.6806 | -     |
|            |            | 308             | 12.99                                 | 22.44    | 0.7710 | -     |
|            |            | 318             | 15.33                                 | 25.69    | 0.7815 | -     |
|            | CCAL       | 298             | 19.41                                 | 14.29    | 0.8363 | -     |
|            |            | 308             | 21.40                                 | 14.42    | 0.7583 | -     |
|            |            | 318             | 22.31                                 | 13.30    | 0.7226 | -     |
|            | CALP       | 298             | 13.08                                 | 1.96     | 0.8807 | -     |
|            |            | 308             | 17.66                                 | 2.04     | 0.8692 | -     |
|            |            | 318             | 16.13                                 | 1.90     | 0.8621 | -     |
|            | CCALP      | 298             | 19.01                                 | 1.96     | 0.8796 | -     |
|            |            | 308             | 17.82                                 | 1.85     | 0.8850 | -     |
|            |            | 318             | 16.16                                 | 1.76     | 0.8996 | -     |
